# Supplementary material for: The Impact of Domestic Cooking Methods on Myrosinase Stability, Glucosinolates and Their Hydrolysis Products in Different Cabbage (Brassica oleracea) Accessions
Source: MDPI journal article supplement (doi:10.3390/foods10122908), 2021-11-24
Supplement: s1 [file s1]

## Supplementary data 1

**Table S1:** Origin, botanical and common names of cabbage accessions planted

| Genus/Type                                     | Accession name                                  | Accession code | Common name          | Origin        | Head formation |
|------------------------------------------------|-------------------------------------------------|----------------|----------------------|---------------|----------------|
| <b>Black kale</b>                              |                                                 |                |                      |               |                |
| <i>Brassica oleracea</i> var. <i>acephala</i>  | Cavolo nero di toscana o senza palla (BK-CNDTP) | BK1            | Fodder black kale    | Italy         | Open leaf      |
| <i>Brassica oleracea</i> var. <i>acephala</i>  | Cavolo palmizio (BK-CPNT)                       | BK2            | Black kale           | Italy         | Open leaf      |
| <i>Brassica oleracea</i> var. <i>acephala</i>  | Cavolo nero di toscana o senza testa (BK-CNDTT) | BK3            | Fodder black kale    | Italy         | Open leaf      |
| <b>Wild</b>                                    |                                                 |                |                      |               |                |
| <i>Brassica oleracea</i>                       | Wild cabbage (WD-8707)                          | WD1            | Wild cabbage         | Great Britain | Open leaf      |
| <i>Brassica oleracea</i>                       | Wild cabbage (WD-GRU)                           | WD2            | Wild cabbage         | New Zealand   | Open leaf      |
| <i>Brassica oleracea</i>                       | Wild cabbage (WD-8714)                          | WD3            | Wild cabbage         | Great Britain | Open leaf      |
| <b>Tronchuda</b>                               |                                                 |                |                      |               |                |
| <i>Brassica oleracea</i> var. <i>tronchuda</i> | Penca mistura (TC-PCM)                          | TC1            | Tronchuda cabbage    | Portugal      | Open leaf      |
| <i>Brassica oleracea</i> var. <i>tronchuda</i> | Penca povoa (TC-CPDP)                           | TC2            | Tronchuda cabbage    | Portugal      | Open leaf      |
| <i>Brassica oleracea</i> var. <i>tronchuda</i> | Tronchuda (TC-T)                                | TC3            | Tronchuda cabbage    | Portugal      | Open leaf      |
| <b>Savoy</b>                                   |                                                 |                |                      |               |                |
| <i>Brassica oleracea</i> var. <i>capitata</i>  | Hybrid savoy virosa cabbage (SC-HSC)            | SC1            | Hybrid savoy cabbage | Great Britain | Closed heart   |
| <i>Brassica oleracea</i> var. <i>capitata</i>  | Pointed winter (SC-PW)                          | SC2            | Savoy cabbage        | Great Britain | Closed heart   |
| <i>Brassica oleracea</i> var. <i>capitata</i>  | Dark green (SC-SDG)                             | SC3            | Savoy cabbage        | Italy         | Closed heart   |
| <b>Red</b>                                     |                                                 |                |                      |               |                |
| <i>Brassica oleracea</i> var. <i>capitata</i>  | Red langendijker (RC-RL)                        | RC1            | Red cabbage          | Great Britain | Closed heart   |
| <i>Brassica oleracea</i> var. <i>capitata</i>  | Rocco marner (Hybrid) (RC-RM)                   | RC2            | Hybrid red cabbage   | Great Britain | Closed heart   |
| <i>Brassica oleracea</i> var. <i>capitata</i>  | Red Danish (RC-RD)                              | RC3            | Red cabbage          | Netherlands   | Closed heart   |
| <b>White</b>                                   |                                                 |                |                      |               |                |
| <i>Brassica oleracea</i> var. <i>capitata</i>  | Early market (WC-FEM)                           | WC1            | White spring cabbage | Great Britain | Closed heart   |
| <i>Brassica oleracea</i> var. <i>capitata</i>  | Couve repolho (WC-CRB)                          | WC2            | White cabbage        | Portugal      | Closed heart   |
| <i>Brassica oleracea</i> var. <i>capitata</i>  | De louviers (WC-DLI)                            | WC3            | Hybrid white cabbage | Great Britain | Closed heart   |

**Table S2.** Consumption intent and cooking time scores from preliminary consumer study.

| Sample / Attribute                        | <sup>1</sup> Cooking method and time (secs) |     |                   |                  |                   |            |
|-------------------------------------------|---------------------------------------------|-----|-------------------|------------------|-------------------|------------|
|                                           | Steamed                                     |     | 90                | Stir-fried       |                   | Microwaved |
|                                           | 120                                         | 180 |                   | 120              | 150               | 180        |
| <b>Closed heart cabbage (Red cabbage)</b> |                                             |     |                   |                  |                   |            |
| Cooking standard <sup>2</sup>             | 3.3                                         | 3.4 | 2.8               | 3.0              | 2.8               | 3.8        |
| Consumption intent <sup>3</sup>           | 3.3                                         | 3.2 | 3.6               | 3.5              | 3.5               | 2.9        |
| <b>Open leaf cabbaged (Black kale)</b>    |                                             |     |                   |                  |                   |            |
| Cooking standard <sup>2</sup>             | 2.7                                         | 2.9 | 2.5               | 2.7              | 2.7               | 2.7        |
| Consumption intent <sup>3</sup>           | 2.6                                         | 2.9 | 2.5 <sup>ab</sup> | 2.1 <sup>a</sup> | 2.6 <sup>ab</sup> | 2.3        |

<sup>1</sup> Means values from 60 consumers; mean values with different superscripts in the same row within the same cooking condition and cabbage type are significantly different at  $p < 0.0001$ . <sup>2</sup> Means measured on a Just-About-Right (JAR) scale (where 1: not cooked enough, 3: JAR and 5: much too overcooked). <sup>3</sup> Mean values measured on a 5-point scale (where 1: definitely would not eat; 3: may or may not eat; 5: definitely would eat).

**Table S3.** Relative activity (A/A<sub>0</sub>±SD) of myrosinase enzyme after domestic cooking of cabbage.

| Cabbage<br>Type/Accession | Relative activity (A/A <sub>0</sub> ) |                            |                            |
|---------------------------|---------------------------------------|----------------------------|----------------------------|
|                           | Steamed                               | Microwaved                 | Stir-fried                 |
| <b>Black kale</b>         |                                       |                            |                            |
| BK-CNDTP                  | 0.05±0.01 <sup>ab A</sup>             | 0.05±0.01 <sup>ab A</sup>  | 0.65±0.01 <sup>l G</sup>   |
| BK-CPNT                   | 0.11±0.01 <sup>a-e D</sup>            | 0.11±0.05 <sup>a-e D</sup> | 0.52±0.11 <sup>jk E</sup>  |
| BK-CNDTT                  | 0.08±0.05 <sup>a-e B</sup>            | 0.09±0.05 <sup>a-e C</sup> | 0.56±0.13 <sup>kl F</sup>  |
| <b>Wild</b>               |                                       |                            |                            |
| WD-8707                   | 0.05±0.02 <sup>ab C</sup>             | 0.05±<0.01 <sup>ab C</sup> | 0.41±0.03 <sup>hij F</sup> |
| WD-GRU                    | 0.08±0.03 <sup>a-d D</sup>            | 0.05±0.01 <sup>ab B</sup>  | 0.46±0.12 <sup>h-k G</sup> |
| WD-8714                   | 0.03±<0.01 <sup>ab A</sup>            | 0.03±<0.01 <sup>ab A</sup> | 0.38±0.03 <sup>hi E</sup>  |
| <b>Tronchuda</b>          |                                       |                            |                            |
| TC-PCM                    | 0.08±0.03 <sup>a-e D</sup>            | 0.08±0.03 <sup>a-e D</sup> | 0.34±0.06 <sup>gh F</sup>  |
| TC-CPDP                   | 0.08±0.03 <sup>a-d C</sup>            | 0.07±0.02 <sup>a-d B</sup> | 0.38±0.05 <sup>ghi G</sup> |
| TC-T                      | 0.07±0.03 <sup>a-d C</sup>            | 0.06±0.02 <sup>a-d A</sup> | 0.20±0.05 <sup>ef E</sup>  |
| <b>Savoy</b>              |                                       |                            |                            |
| SC-HSC                    | 0.04±0.01 <sup>ab E</sup>             | 0.02±0.01 <sup>a C</sup>   | 0.19±0.03 <sup>def G</sup> |
| SC-PW                     | 0.02±0.01 <sup>a B</sup>              | 0.01±<0.01 <sup>a A</sup>  | 0.03±<0.01 <sup>ab D</sup> |
| SC-SDG                    | 0.02±0.01 <sup>a C</sup>              | 0.02±0.01 <sup>a C</sup>   | 0.09±0.01 <sup>a-e F</sup> |
| <b>Red</b>                |                                       |                            |                            |
| RC-RL                     | 0.13±0.04 <sup>a-e D</sup>            | 0.13±0.04 <sup>a-e D</sup> | 0.49±0.18 <sup>ijk H</sup> |
| RC-RM                     | 0.15±0.03 <sup>b-f E</sup>            | 0.10±0.04 <sup>a-e C</sup> | 0.37±0.08 <sup>ghi G</sup> |
| RC-RD                     | 0.04±0.01 <sup>ab A</sup>             | 0.05±0.02 <sup>ab B</sup>  | 0.26±0.02 <sup>fg F</sup>  |
| <b>White</b>              |                                       |                            |                            |
| WC-FEM                    | 0.04±0.02 <sup>ab A</sup>             | 0.05±0.02 <sup>ab B</sup>  | 0.09±0.02 <sup>a-e D</sup> |
| WC-CRB                    | 0.06±0.03 <sup>abc C</sup>            | 0.05±0.02 <sup>ab B</sup>  | 0.18±0.03 <sup>c-f E</sup> |

Values are means of three processing replicates (each replicate comprising of 4-5 cabbage heads) and two technical replicates (n=6±SD). SD: standard deviation from mean. Letters “ABC”: mean values not sharing a common uppercase letter differ significantly (p < 0.05) between accessions and treatments within a cabbage morphotype. Letters “abc”: mean values not sharing a common lowercase letter differ significantly (p < 0.05) between cabbage morphotypes, accessions, and treatments. A/A<sub>0</sub> = residual activity, defined as the ratio of myrosinase activity of processed (cooked) cabbage to unprocessed (raw) cabbage. Key: BK-CNDTP: Cavolo nero di toscana o senza palla; BK-CPNT: Cavolo palmizio; BK-CNDTT: Cavolo nero di toscana o senza testa; WD-8707: Wild cabbage 8707; WD-GRU: Wild cabbage 7338; WD-8714: Wild cabbage 8714; TC-PCM: Penca mistura; TC-CPDP: Penca povoa; TC-T: Tronchuda; SC-HSC: Hybrid savoy virosa; SC-PW: Pointed winter; SC-SDG: Dark green; RC-RL: red langendijker; RC-RM: Rocco marner (Hybrid); RC-RD: Red Danish; WC-FEM: Early market; WC-CRB: Couve repolho; WC-DLI: De louviers.

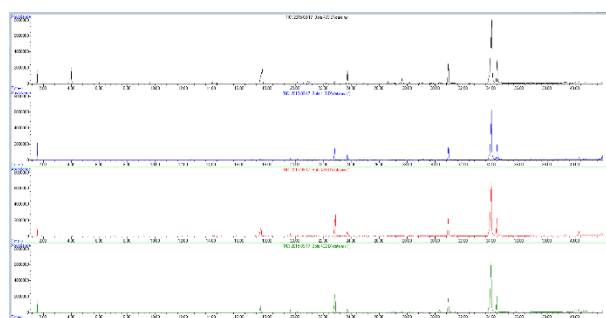

(a) Black kale

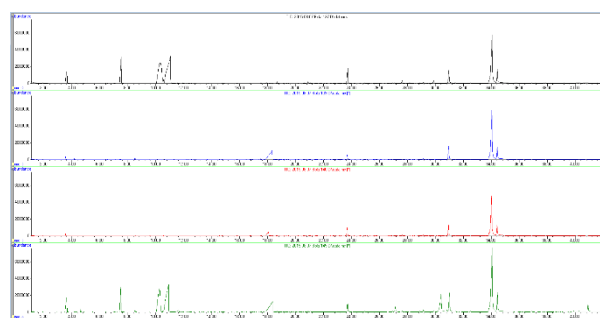

(b) Wild cabbage

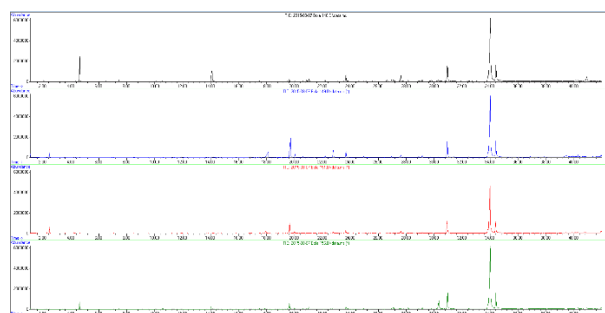

(c) Tronchuda cabbage

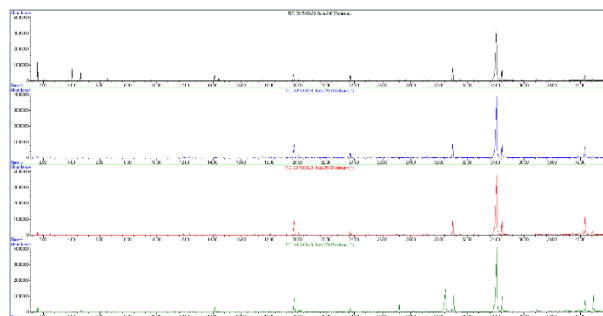

(d) Savoy cabbage

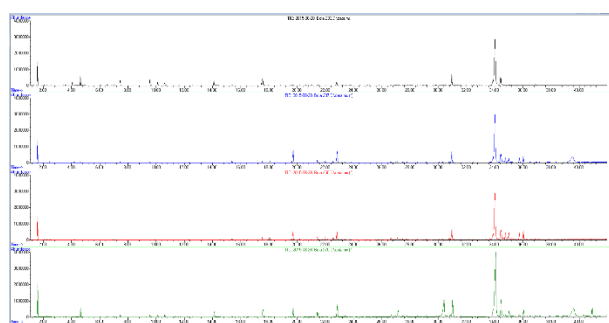

(e) Red cabbage

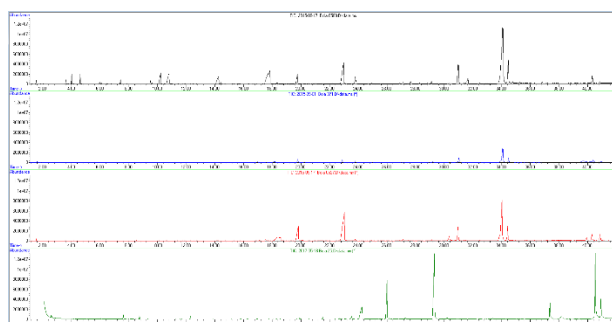

(f) White cabbage

**Figure S1.** Examples of GC-MS chromatograms for raw and cooked samples for each morphotype of cabbage studied (a) Black kale; (b) Wild cabbage; (c) Tronchuda cabbage; (d) Savoy cabbage; (e) Red cabbage and (f) White cabbage. Chromatogram colour keys: Black – Raw; Blue – steamed; Red – Microwaved and Green – stir-fried.
